# Supplementary material for: Stroke in Asia: geographical variations and temporal trends
Source: HighWire-hosted journal article supplement (doi:10.1136/jnnp-2013-306992), 2014-04-25
Supplement: jnnp-2013-306992supp_table1.pdf [file jnnp-2013-306992supp_table1.pdf]

**Table 1: Epidemiological studies from selected Asian Countries**

| <b>COUNTRY</b>                            | <b>STUDY PERIOD</b> | <b>DEFINITION OF STROKE</b>                                                               | <b>INCIDENCE</b>                                                                             | <b>STUDY DESIGN</b> | <b>CASE ASCERTAINMENT</b>                         | <b>SHORTCOMINGS</b>                     |
|-------------------------------------------|---------------------|-------------------------------------------------------------------------------------------|----------------------------------------------------------------------------------------------|---------------------|---------------------------------------------------|-----------------------------------------|
| <b>Japan<br/>Miyakojima<br/>Study (7)</b> | 2002-<br>2005       | Acute neurological deficit confirmed in hospital by CT/MRI in 99%<br><br>Age 30 and above | 145/100,000/year<br><br>Age adjusted using standard population of Japan                      | Retrospective       | Hospital based                                    | Those not presenting to hospital missed |
| <b>Japan<br/>Hisayama<br/>Study (8)</b>   | 2002-<br>2009       | WHO definition with imaging<br><br>Age 40 and above                                       | 422/100,000/year in men<br><br>212/100,000/year in women<br><br>Age adjusted to WHO standard | Prospective         | Community based<br><br>Annual health examinations | Small cohort but no loss to follow up   |

|                                                        |               |                                                                               |                                                                             |                                  |                                                                                        |                                                                                                                              |
|--------------------------------------------------------|---------------|-------------------------------------------------------------------------------|-----------------------------------------------------------------------------|----------------------------------|----------------------------------------------------------------------------------------|------------------------------------------------------------------------------------------------------------------------------|
|                                                        |               |                                                                               | population                                                                  |                                  |                                                                                        |                                                                                                                              |
| <b>China</b><br><b>Sino Monica</b><br><b>study (9)</b> | 2004          | WHO-Monica<br>project<br>definition                                           | 248.3/100,000/year<br><br>Age standardized<br>to Chinese national<br>census | Prospective                      | 3 level network<br><br>Hospital as well as<br>community based to<br>capture all events | Beijing only<br><br>Sample selected by<br>non-random cluster<br>sampling                                                     |
| <b>China</b><br><b>(10)</b>                            | 2005-<br>2011 | Hospital<br>admission<br>with stroke                                          | 168.5/100,000/year<br>(95% CI 159-178)                                      | Retrospective and<br>prospective | Hospital based                                                                         | Those not presenting<br>to hospital missed<br><br>Not age<br>standardized                                                    |
| <b>Korea</b><br><b>(11)</b>                            | 2004          | Insurance<br>claim data<br>confirmed<br>using clinical<br>and imaging<br>data | 216/100,000/year<br><br>Not age<br>standardized                             | Retrospective                    | Registry based data                                                                    | Based on analysis of<br>insurance claim<br>database and<br>national death<br>certificate data<br><br>Not age<br>standardized |
| <b>Taiwan</b>                                          | 1986-         | WHO<br>definition plus                                                        | 329/100,000/year                                                            | Prospective                      | Community based                                                                        | Imaging done in                                                                                                              |

|                                |           |                                     |                                                                   |                 |                                                                           |                                                                                         |
|--------------------------------|-----------|-------------------------------------|-------------------------------------------------------------------|-----------------|---------------------------------------------------------------------------|-----------------------------------------------------------------------------------------|
| <b>(12)</b>                    | 1990      | imaging<br><br>Age 35 and above     | (95% CI 259-399)<br><br>Age adjusted to 1960 US population        |                 |                                                                           | 65% only<br><br>More recent data not available                                          |
| <b>Thailand</b><br><b>(13)</b> | 2004-2006 | WHO definition                      | No incidence data.<br>Only prevalence                             | Cross-sectional | Community based                                                           | Selection bias<br><br>Non probability sampling<br><br>No neuro-imaging<br><br>Age 45-84 |
| <b>Malaysia</b><br><b>(14)</b> | 2010-2011 | WHO definition<br><br>All ages      | 67/100,000/year<br><br>Standardized to 2010 Malaysian population  | Prospective     | Multiple sources including hospitals and private physicians               | Those not presenting to physicians not captured                                         |
| <b>India</b><br><b>(15)</b>    | 2003-2005 | Neurological assessment +/- imaging | 145.3/100,000/year<br>(95% CI 120.4-174.4)<br><br>Standardized to | Prospective     | Community based house to house<br>Screening questionnaire administered by | Captured both strokes and stroke deaths.<br><br>Stroke deaths                           |

|                          |      |                                        |                                                                         |             |                                                                                                                                     |                                                                                               |
|--------------------------|------|----------------------------------------|-------------------------------------------------------------------------|-------------|-------------------------------------------------------------------------------------------------------------------------------------|-----------------------------------------------------------------------------------------------|
|                          |      |                                        | World Standard population                                               |             | CHW<br>Those testing positive were examined by neurologist                                                                          | however, were based on family member's account of death<br>Screening by CHWs                  |
| <b>India (16)</b>        | 2005 | WHO definition with or without imaging | 135/100,000/year (123-146)<br>Standardized to World Standard Population | Prospective | Diagnosis based on information from patients, caregivers and hospital records and fatal event registers through active surveillance | Community stroke events not captured                                                          |
| <b>Iran Isfahan (17)</b> | 2003 | WHO definition/<br>90% imaging         | 103/100,000/year (95% CI 97.4-109.1)                                    | Prospective | Hospital based identification                                                                                                       | Crude. No age standardization<br>Excluded 2 hospitals<br>Included first and recurrent strokes |
| <b>Iran</b>              | 2006 | WHO                                    | 203/100,000/year                                                        | Prospective | Community and                                                                                                                       | Used multiple sources for                                                                     |

|      |  |            |                                                                    |  |                |                              |
|------|--|------------|--------------------------------------------------------------------|--|----------------|------------------------------|
| (18) |  | definition | (95% CI 175-231)<br><br>Age standardized<br>to World<br>population |  | hospital based | identification of<br>stroke. |
|------|--|------------|--------------------------------------------------------------------|--|----------------|------------------------------|
