# Supplementary material for: Stroke in Asia: geographical variations and temporal trends
Source: HighWire-hosted journal article supplement (doi:10.1136/jnnp-2013-306992), 2014-04-25
Supplement: jnnp-2013-306992supp_table4.pdf [file jnnp-2013-306992supp_table4.pdf]

**Table 4: Temporal Trends in Stroke Epidemiology**

| <b>COUNTRY</b> | <b>TRENDS IN STROKE INCIDENCE AND PREVALENCE</b>                                             | <b>TRENDS IN STROKE TYPES/SUBTYPES</b>                                                                                                                                                                                                                  |
|----------------|----------------------------------------------------------------------------------------------|---------------------------------------------------------------------------------------------------------------------------------------------------------------------------------------------------------------------------------------------------------|
| <b>JAPAN</b>   | Decline in both ischemic and hemorrhagic strokes over past decades                           | Proportion of ischemic strokes has increased compared to hemorrhagic<br><br>Incidence of lacunar strokes has decreased over time, whereas that of large vessel and cardioembolic has remained stable                                                    |
| <b>CHINA</b>   | Increase in age standardized incidence of total strokes in both men and women from 1984-2004 | Incidence of ischemic strokes has gone up and that of intracranial hemorrhages has declined.<br><br>Among ischemic stroke subtypes, there is evidence to suggest a rise in both intracranial atherosclerosis and cardio-embolism                        |
| <b>KOREA</b>   | Annual incidence expected to increase rapidly over next decade                               | Ischemic strokes admissions have increased compared to hemorrhagic strokes<br><br>Among subtypes, large artery atherosclerosis particularly of intracranial arteries was and still is the predominant subtype<br><br>Proportion of small vessel disease |

|                  |                                                                  |                                                                                                                                                                                                                                                    |
|------------------|------------------------------------------------------------------|----------------------------------------------------------------------------------------------------------------------------------------------------------------------------------------------------------------------------------------------------|
|                  |                                                                  | shows a downward trend whereas cardio-embolism has shown a rise                                                                                                                                                                                    |
| <b>TAIWAN</b>    | No temporal trend data available for stroke incidence as a whole | Ischemic strokes are the predominant subtype and a rising trend in their incidence has been reported<br><br>Lacunar strokes are the predominant subtype and have increased in the recent years. Cardioembolic strokes have decreased in proportion |
| <b>THAILAND</b>  | Prevalence has shown an increase over time                       | Ischemic strokes are the predominant subtype reported in almost 80%<br><br>Intracranial atherosclerosis accounts for most of ischemic strokes<br><br>Temporal trend data for subtypes not available                                                |
| <b>MALAYSIA</b>  | 5th leading cause of mortality<br><br>No data on temporal trends | Ischemic strokes were and still are the predominant type<br><br>Large artery atherosclerosis is the most common subtype from the National stroke registry. Previously lacunar strokes were reported as the most common subtype                     |
| <b>SINGAPORE</b> | No data on temporal trend in prevalence/incidence                | No change in relative proportion of stroke type between 2000 and 2005                                                                                                                                                                              |
| <b>INDIA</b>     | Temporal trends in incidence/prevalence not reported             | Ischemic strokes have remained the predominant subtype in the reported                                                                                                                                                                             |

|                   |                                                   |                                                                                                                                                                                                                                                                                                                     |
|-------------------|---------------------------------------------------|---------------------------------------------------------------------------------------------------------------------------------------------------------------------------------------------------------------------------------------------------------------------------------------------------------------------|
|                   |                                                   | <p>data</p> <p>Data on subtype temporal trends not available</p>                                                                                                                                                                                                                                                    |
| <b>BANGLADESH</b> | No data available                                 | No data available                                                                                                                                                                                                                                                                                                   |
| <b>PAKISTAN</b>   | No data available                                 | <p>Ischemic strokes are the predominant subtype although some evidence to show a temporal rise in hemorrhagic stroke admissions</p> <p>Large artery atherosclerosis is now the predominant subtype. Previously lacunar strokes were more common</p> <p>Proportion of cardioembolic strokes have gone up as well</p> |
| <b>IRAN</b>       | Rise in stroke incidence from 2001 to 2005        | No substantial change in stroke type/subtype over time                                                                                                                                                                                                                                                              |
| <b>ISRAEL</b>     | No data on temporal trend in incidence/prevalence | <p>Cardioembolism on the rise in elderly</p> <p>Small vessel strokes decreasing</p>                                                                                                                                                                                                                                 |
